# Supplementary material for: Methane oxidation potential of the arctic wetland soils of a taiga-tundra ecotone in northeastern Siberia
Source: Copernicus journal article supplement (doi:10.5194/bg-2019-98), 2019-04-01
Supplement: Supplementary file [file bg-2019-98-AC3-supplement.pdf]

**Methane oxidation potential of the arctic wetland soils of a taiga-tundra ecotone in northeastern Siberia**

Jun Murase<sup>1</sup>, Atsuko Sugimoto<sup>2,3</sup>, Ryo Shingubara<sup>3\*</sup>, Tomoki Morozumi<sup>3</sup>, Shinya

5 Takano<sup>3</sup>, Trofim C. Maximov<sup>4,5</sup>

<sup>1</sup>Graduate School of Bioagricultural Science, Nagoya University, Nagoya, 464-8601, Japan

<sup>2</sup>Arctic Research Center, Hokkaido University, Sapporo, 001-0021, Japan.

<sup>3</sup>Graduate School of Environmental Science, Hokkaido University, Sapporo, 060-0810, Japan

<sup>4</sup>Institute for Biological Problems of Cryolithozone Siberian Branch, Russian Academy of Science, 41 Lenina ave., Yakutsk 677980, Russia

<sup>5</sup>Biogeochemistry Educational and Scientific Training Center, North-Eastern Federal University, 58 Belinsky str, Yakutsk 677000, Russia

15 \*Present address: Graduate School of Environmental Studies, Nagoya University, Nagoya 464-8601, Japan

**Correspondence to:** Jun Murase ([murase@agr.nagoya-u.ac.jp](mailto:murase@agr.nagoya-u.ac.jp))

## Abstract.

Arctic wetlands are significant sources of atmospheric methane and the observed accelerated climate changes in the arctic could cause a change in methane dynamics.

Methane oxidation would be the key process to control methane emission from wetlands.

5 In this study we determined the potential methane oxidation rate of the wetland soils of a taiga-tundra transition zone in northeastern Siberia. Peat soil samples were collected in summer from depressions covered with tussocks of sedges and *Sphagnum* spp. and from mounds vegetated with moss and larch trees. An aerobic bottle incubation experiment demonstrated that the soil samples collected from depressions in the moss- and sedge-  
10 dominated zones exhibited active methane oxidation with no time lag. The potential methane oxidation rates at 15 °C ranged from 94 to 496 nmol h<sup>-1</sup> g<sup>-1</sup> dw. Methane oxidation was observed over the depths studied (0–40 cm) including the water-saturated anoxic layers. The maximum methane oxidation rate was recorded in the layer above the water-saturated layer: the surface (0–2cm) layer in the sedge-dominated zone and in the  
15 middle (4–6 cm) layer in the moss-dominated zone. The methane oxidation rate was temperature-dependent, but substantial methane oxidation was observed even at 0 °C particularly for the moss soil samples. Soil samples collected from the frozen layer of *Sphagnum* peat also showed immediate methane consumption when incubated at 15 °C. The present results suggest that the methane oxidizing bacteria in the wetland soils could  
20 survive under anoxic and frozen conditions keeping their potential activities and immediately utilize methane when the conditions become favorable. On the other hand, the inhibitor of methane oxidation (difluoromethane) did not affect the methane flux from the sedge and moss zones *in situ*, which suggested the minor role of plant-associated methane oxidation.

## 1 Introduction

Methane is a greenhouse gas produced in natural and anthropogenic anaerobic environments as the terminal product of organic decomposition. Arctic wetlands, where large amounts of organic carbon are stored (Tarnocai et al., 2009; Hugelius et al., 2014), are one of the largest sources of atmospheric methane (Kirschke et al., 2013; Intergovernmental\_Panel\_on\_Climate\_Change, 2014). Methane emission from the Arctic wetlands could be increased by climate changes that include increasing temperatures, changing precipitation patterns, and permafrost thaw (Olefeldt et al., 2013; Schuur et al., 2015; Treat et al., 2015).

Methane emission from the wetlands to the atmosphere is the result of the balance between methane production and consumption. It is estimated that 50 Tg of methane are annually produced in boreal wetlands and 15 Tg of produced methane are consumed before emitted to the atmosphere (Reeburgh, 2007). The oxic-anoxic interfaces such as the surface of the wetland soils and the rhizosphere of aerenchymatous plants are often characterized by the active methane oxidation thus playing a key role in controlling methane flux from the wetlands (Zhuang et al., 2004; Preuss et al., 2013).

The methane oxidation in arctic wetland soils has been reported repeatedly. In many studies the potential methane oxidation was determined using an incubation experiment in which the collected samples were aerobically incubated with high concentrations of methane, and its controlling factors have been studied (Wagner et al., 2003, 2005; Liebner and Wagner, 2007; Knoblauch et al., 2008; Christiansen et al., 2015). The potential methane oxidation rate differs spatially and temporally under the influence of different

environmental conditions. For example, Wagner *et al.* (2003) reported that methane oxidation in polygon depression in the Lena Delta, Siberia, was higher than in polygon rim with the increasing rate and expanding active depth with time in summer. The methane oxidation rate at the *in situ* temperature (0.4–7.5°C) ranged 1.9–7.0 nmol h<sup>-1</sup> g<sup>-1</sup> except for the boundary to the frozen ground where no methane oxidation was recorded (Wagner *et al.*, 2003, 2005). Much higher potential methane oxidation rates were recorded in permafrost-affected soils of Northeast Siberia with 45–87 nmol h<sup>-1</sup> g<sup>-1</sup> for mineral soils and 835 nmol h<sup>-1</sup> g<sup>-1</sup> for organic soil at the *in situ* temperature (5 °C) (Knoblauch *et al.*, 2008); 8–32% of the maximum oxidation rate was observed at 0 °C. Thus, water level, soil depth, and temperature are the major factors that affect the methanotrophic activity in the arctic wetlands.

Aerenchymatous plants provide a niche for methane oxidizing bacteria in the rhizosphere where oxygen and methane are both available in wetlands (Frenzel, 2000). Moss has a symbiotic association with methanotrophs: methanotrophs use oxygen supplied from moss to oxidize methane and moss utilizes CO<sub>2</sub> produced by methanotrophs for photosynthesis (Raghoebarsing *et al.*, 2005; Kip *et al.*, 2010, 2011; Larmola *et al.*, 2010; Liebner *et al.*, 2011). The specific inhibitors such as methyl fluoride (CH<sub>3</sub>F) and difluoromethane (CH<sub>2</sub>F<sub>2</sub>) are used to estimate the contribution of plant-associated methane oxidation to methane flux in wetland soils (Frenzel and Bosse, 1996; Frenzel and Rudolph, 1998; Kruger *et al.*, 2001). In this technique, it is assumed that the inhibitor injected in a flux chamber diffuses to the oxic part of a system, where inhibits methane oxidation, thus allowing estimation of methane oxidation *in situ* by comparing methane fluxes under the conditions with and without the inhibitor. The estimated contribution of methane oxidation to the total methane flux from the wetland rice

determined by specific inhibition with difluoromethane ranged from 0 to 40% (Kruger et al., 2001), while no contribution of methane oxidation associated with *Eriophorum* was observed in the bog of Estonia (Frenzel and Rudolph. 1998). However, the contribution of plant-associated methane oxidation to methane flux has been poorly studied in the  
5 arctic wetlands (Liebner et al., 2011; Nielsen et al., 2017).

Most studies to determine the potential methane oxidation rates of the arctic wetlands have been done by *in vitro* incubations; the target samples were transferred from the study sites to the laboratory and the methane oxidation activity was measured after some time of storage, which may affect the enzymatic activities of soils depending on the type  
10 (Burns et al., 2013). Also, it is not clear if the measured methane oxidation represents the actual potential of the collected samples or if the methanotrophic activity was induced by incubation because the temporal change in methane concentration in the system is poorly documented in the incubation experiments. In this study, we measured the potential methane oxidation of the wetland soils in the northeastern Siberia immediately (< 24 h)  
15 after sample collection to avoid possible bias caused by sample storage as much as possible. The incubation experiments were conducted to study the depth profile of the potential methane oxidation of wetland soils under different conditions and the temperature dependence of potential methane oxidation. As microbial growth in Arctic soil could be limited by the availability of nutrients like nitrogen (Sistla et al., 2012), the  
20 effect of minerals on the potential methane oxidation was also studied by adding salts and black carbon that are supposed to be transferred from the sea and forest fire to the arctic region (de Caritat et al., 2005). Besides the potential methane oxidation of soils, we estimated plant-associated *in situ* methane oxidation for the first time in the arctic wetlands by measuring the methane fluxes using the specific inhibitor of methane

oxidation (difluoromethane).

## 2 Methods

### 5 2.1 Sample collection

Active layer samples were collected from the wetland soils of a taiga-tundra transition zone along the tributary of Indigirka River (N 70°33.8', E 148°15.9') in northeastern Siberia, Russia (Fig. 1a & b), during the summer (July) of 2012–2015. Samples collected  
10 and experiments conducted for each year are summarized in Table 1. The study site was described before with the name of Kryvaya or site K (Iwahana et al., 2014; Liang et al., 2014; Morozumi et al., 2019). Three representative vegetation types were selected: two depression zones that were dominantly covered with moss-wet (*Sphagnum* spp., Fig. 1c) or tussocks of sedges (*Carex* spp., Fig. 1d) and a dry mound vegetated with moss and  
15 larch trees (Fig. 1e). Blocks of the surface soil (0–10 cm) was collected in triplicate using a serrated knife in 2012 and 2014. Different layers (0–2, 4–6, and 8–10 cm) of soil were subsampled in 2013. Soil samples in the deeper layer including the surface part of the frozen layer was also collected from the depression zones in 2015 using a metallic core sampler (i.d., 4 cm; length, 80 cm). Collected samples were stored at 4 °C and subjected  
20 to measurement of potential methane oxidation within a day.

### 2.2 Vertical profiling of dissolved oxygen in soil

The vertical profile of dissolved oxygen in peat soil of the sedge and moss wetlands was

measured by inserting a DO meter (HI 2040-01, Hanna Instruments, RI, U.S.A.) into small wells (diameter: ca. 1.5 cm) that were made by drilling the peat with a wooden stick a few days prior to measurement. The soil was water saturated and we measured the DO of the saturated water.

5

### 2.3 Methane oxidation potential of soil samples

Samples were homogenized by cutting into pieces (< 5 mm) with scissors and mixing, and 10 g of wet subsamples were put into 50-ml or 100-ml GC vials (Nichiden-Rika Grass, 10 Kobe, Japan). The vials were capped with butyl rubber stoppers and open top screw caps, and injected with 0.5 (2012) or 1.0 (the other years) ml of 99% methane to give an initial concentration of ca. 5,000 or 10,000 ppmv in the headspace containing atmospheric air. The samples were incubated in the dark at 15 °C. Methane concentration in the headspace was monitored using a photoacoustic field gas monitor (Innova 1412, LumaSense 15 Technologies, Ballerup, Denmark). The methane oxidation rate was calculated from the linear regression of the methane concentration decreasing with time. The methane oxidation rate was expressed per dry weight of samples that was obtained by drying at 80 °C for 48 hrs.

To examine the effect of nutrients and black carbon—potential atmospheric 20 depositions in the Arctic—on methane oxidation, the samples (10 g) collected in 2012 were applied with 1 ml of inorganic solution (10 µM NH<sub>4</sub>NO<sub>3</sub>, 250 µM NaCl, 40 µM CaCl<sub>2</sub>, 20 µM MgSO<sub>4</sub>, 10 µM KCl) and/or 1 ml of 100 µg l<sup>-1</sup> charcoal powder of oak (*Quercus* L., <47 µm). The soil incubation was done as described above.

Temperature dependence of methane oxidation was studied as described above under

different incubation temperatures (0, 5, 10 and 15 °C) using the surface layer soils of the moss- and sedge-dominated wetlands collected in 2013. The temperature coefficient ( $Q_{10}$ ) of methane oxidation was calculated for three temperature ranges (0 to 5, 5 to 10, and 10 to 15 °C):

$$5 \quad Q_{10} = \left( \frac{R_2}{R_1} \right)^{\left( \frac{10}{T_2 - T_1} \right)}$$

where  $R_1$  and  $R_2$  are the methane oxidation rates at the temperatures of  $T_2$  and  $T_1$  ( $T_1 < T_2$ ), respectively.

#### 2.4 Estimation of plant-associated methane oxidation to methane flux

10

The contribution of methane oxidation associated with the wetland plants to methane flux was estimated using difluoromethane ( $\text{CH}_2\text{F}_2$ ) in 2014 and 2015 according to Kruger et al. (2001). Methane flux from the wetlands with different vegetation types was measured by a closed chamber method in which the surface of the wetlands was covered with a plexiglass chamber (height: 25 cm, inner diameter: 24.5 cm). Gas samples in the headspace were taken every 15 min into 20-ml pre-vacuumed vials for 3 times (0, 15, and 30 min). After the first flux measurement, the gas phase in the chamber was refreshed with atmospheric air by using a pump and then injected with  $\text{CH}_2\text{F}_2$  at the concentration of 1 % (v/v). Then, the second measurement of methane flux was done 10–15 min after injection of the inhibitor in 2014; as no influence of the inhibitor on the methane flux was observed, we extended the exposure time of the inhibitor to 18–19 hrs in 2015 in order to verify the result in 2014. Methane concentration in the collected gas samples were determined by a FID-GC (GC-14B, Shimadzu, Kyoto, Japan) and the methane flux before and after the injection of the inhibitor was calculated from the linear regression of



methane concentration with time. At least two chambers were set per site and methane flux measurement without the inhibitor was conducted in parallel to monitor the temporal shift of methane flux which could affect our interpretation of the effect of the inhibitor on methane flux.

5

## 2.5 Statistical analysis

Differences in methane oxidation rate between treatments were tested with a one-way ANOVA followed by Tukey's multiple comparison and the effect of  $\text{CH}_2\text{F}_2$  on methane emission was assessed by Wilcoxon's test using SPSS for Windows Ver. 22.0.

10

## 3 Results

### 3.1 The relationship between the vegetation types and $\text{CH}_4$ oxidation

15

The methane concentration in the headspace of the bottle with peat samples from wetlands with moss and sedge vegetations rapidly decreased with time from the initial concentration (ca. 5,000 ppmv) to an atmospheric level in 7 days (Figs. 2a & b). On the other hand, the sample from the moss-dominated mound did not show any activity of methane oxidation under the given conditions (Fig. 2c).

20

Addition of nutrients and charcoal powder did not affect methane oxidation of any samples. We also tested 10 times higher concentrations of nutrients and charcoal powder but found no influence on methane oxidation of all the samples (data not shown).

### 3.2 Vertical profile of CH<sub>4</sub> oxidation and DO in pore water

The time course incubation experiment using the different layers of surface (0–10 cm) wetland peat samples in 2013 showed that methane was oxidized with no lag period (Figs. 3a & b). Immediate methane oxidation of the moss peat sample was also observed in the deeper layers in the 2015 measurement even in the frozen layer (30–40 cm) (Fig. 3c). Peat samples from the sedge-dominated wetland up to 20 cm in depth also showed active methane oxidation, but the mineral frozen soil collected from below the organic layer of the sedge-dominated wetland in 2015 exhibited no detectable methane oxidation during the incubation period (Fig. 3d). The calculated methane oxidation rate of the organic layer soils ranged from 54 to 496 nmol h<sup>-1</sup> g<sup>-1</sup> (Table 2). The moss peat samples had higher rates than the sedge peat samples. The highest activity of methane oxidation was recorded at the middle (4–6 cm, 496 nmol h<sup>-1</sup> g<sup>-1</sup>) layer and the top (0–2 cm, 181 nmol h<sup>-1</sup> g<sup>-1</sup>) layer of moss and sedge peat samples, respectively.

The *in situ* concentration of dissolved oxygen in the pore water of the wetlands was very low and undetectable below 10 cm with one exception in the sedge wetland (Fig. 4).

### 3.3. Temperature dependence of methane oxidation

Methane oxidation of surface (0–10 cm) peat samples from moss and sedge wetlands showed a clear temperature dependence. A linear decrease in methane concentration during incubation was observed even at 0 °C (Figs. 5a & b). The methane oxidation rate of the sample from the moss-dominated wetland at 0 °C did not differ from that at 5 °C

(Fig. 5c).  $Q_{10}$  ranged from 1.13 to 2.10 with an exclusively low value for the moss peat samples incubated at 0 and 5 °C (Fig. 6).

### 3.4 Effect of the inhibitor on methane emission from the wetland with different 5 vegetations

The methane flux in the first measurement ranged from 2.4 to 1,800  $\mu\text{mol h}^{-1} \text{m}^{-2}$  (Fig. 7). The methane flux in the second measurement ranged from 0.19 to 1,840  $\mu\text{mol h}^{-1} \text{m}^{-2}$  and the inhibitor did not increase the methane flux in the second measurement for all the  
10 vegetations; this was demonstrated by the 1:1 relationship between the first and second measurements. The prolonged exposure time of the inhibitor from 10–15 min (in 2014) to 18–19 hrs (in 2015) did not cause difference.

## 4 Discussion

15

The wetland soils in the depression area of the taiga-tundra transition zone in the northeastern Siberia exhibited the active methane oxidation in the incubation experiment. The potential rates estimated in this study (54–496  $\text{nmol h}^{-1} \text{g}^{-1}$ ) were at the higher end of the rates measured in other Arctic regions including Siberia using a similar headspace  
20 concentrations of methane (0–835  $\text{nmol h}^{-1} \text{g}^{-1}$ , Knoblauch et al., 2008; 50–66  $\text{nmol h}^{-1} \text{g}^{-1}$ , Christiansen et al., 2015). The highest rate was recorded at the subsurface (4–6 cm) and surface (0–2 cm) of the moss and sedge dominated wetlands, respectively; these depths corresponded to the ground water level of the study site, where the maximum methane oxidation rate has been often reported in other wetlands (e.g., Vecherskaya et al., 1993;

Sundh et al., 1995; Whalen and Reeburgh, 2000). The color of the soils collected from layers under the ground water level darkened soon after sample collection in 2013 and 2015. This is most likely due to a browning reaction exposed to oxygen, which in turn indicates the soil below the ground water was under anoxic conditions. The vertical  
5 profile of DO verified the low oxygen concentration in the soil under the ground water, though the measurement was done in a different year (2014). On the other hand, the mound soil in the same area showed no methane oxidation under the experimental conditions of this study that targeted low-affinity methane oxidation. The results show the spatial heterogeneity of the potential methane oxidation of the soils in the arctic at  
10 inter- and intra-regional scales. We tested our hypothesis that methane oxidation of organic soils may be constrained by limited amounts of mineral nutrients including nitrogen, but application of the mineral salts and charcoal that are supposed to be transferred from the sea or forest fire (de Caritat et al., 2005) did not affect methane oxidation.

15 Plotting the data in the time-course measurement showed that the wetland soils exhibited methane oxidation without time lag when incubated. The immediate methane oxidation was observed throughout the different soil depths in this study except for the mineral soil in the frozen layer of the sedge-dominated wetlands that exhibited no detectable methane oxidation. The immediate methane oxidation upon thaw is also  
20 reported for the frozen permafrost soil from a black-spruce forest in Alaska (Mackelprang et al., 2011). The active methane oxidation throughout the active layer is in contrast with our previous study of the stable isotope signals of dissolved methane that indicated that methane oxidation is limited to the surface layer (up to 10 cm) of the soils in the same study site (Shingubara et al., 2019). This suggests that methanotrophs actually do not

oxidize methane but survive in the deeper layer for a prolonged time under the anoxic/frozen conditions; they keep the potential activity and would be able to immediately oxidize methane when the soil become oxic by decrease in the ground water level (Parmentier et al., 2011; Shingubara et al., 2019). Roslev and King (1996) reported  
5 that peat samples from the freshwater marsh maintain 30% of the initial methane oxidation capacity after 32 days of anoxic incubation and methanotrophs from anoxic peat initiated aerobic methane oxidation within 1–7 hours after oxygen addition.

A clear temperature dependence on potential methane oxidaiton was observed in the top 10 cm layer of the wetland soils. The result is mostly consistent with the previous  
10 reports (e.g., Knoblauch et al., 2008). One different observation was that the soil from the moss wetland incubated at 0 °C showed a comparative acvity of methane oxidation to the soil incubated at 5 °C with the low value of  $Q_{10}$  (1.13 between 0 and 5 °C). This suggests that the methanotrophs in the soil sample from the moss wetland would be less sensitive to change in the low temperatures compared to the sedge-dominated wetland  
15 soil sample and implies that methanotrophs in the soil samples of moss and sedge-dominated wetlands could differently respond to increasing temperature in future. The depth profile of methane oxidation potential was estimated at 15 °C, but the deeper sample could have the higher activity at the lower optimum temperature (Liebner and Wagner, 2007).

20 The methane emission rate in the moss- and sedge-dominated wetlands observed in this study ranging from 7.36 to 1,840  $\mu\text{mol m}^{-2} \text{h}^{-1}$  was mostly comparable to or more than that reported in the previous studies (Cao et al., 1998; Kutzbach et al., 2004; Petrescu et al., 2008). Addition of the inhibitor of methane oxidation did not affect the methane flux from all the vegetations studied. Stable-isotopic studies of dissolved methane in the

Alaska Tundra indicates the minor role of methane oxidation during the transport from the deeper layer to the surface (Throckmorton et al., 2015). The minor role of plant-associated methane oxidation in methane emission from aerenchymatous plants in arctic peatlands was also demonstrated by the recent microcosms study in Greenland using  $^{13}\text{CH}_4$  labelling (Nielsen et al., 2017). The potential activity of methanotrophs may be sustained by the release of oxygen from the aerenchymatous plant roots at the very low level (Nielsen et al., 2017), which may not affect the methane flux from the vegetation. The low *in situ* temperature could be another reason for the undetectable level of the rhizospheric methane oxidation (Saarnio et al., 1997).

A symbiotic relationship between methanotrophs and wetland mosses is well known for *Sphagnum* species (Basiliko et al., 2004; Raghoebarsing et al., 2005; Kip et al., 2010) also for brown mosses (Liebner et al., 2011). The lack of an effect of the added inhibitor in the headspace on the methane flux from the moss-dominated wetlands suggests that moss-associated methanotrophs may not use oxygen diffused from the atmosphere unlike aerenchymatous plants but use oxygen released from moss by photosynthesis (Raghoebarsing et al., 2005). The moss peat samples sustained the methane oxidation potential over the depth studied. Moss-associated methanotrophs may keep their potential activity even after the moss is dead and accumulated in the deeper layer where the conditions are not favorable for methane oxidation due to the anoxia (King, 1996).

In conclusion, the wetland soils of the taiga-tundra ecotone in northeastern Siberia keep the high methane oxidation potential even under anaerobic/frozen conditions that is expressed upon aerobic incubation with methane. The difference in temperature dependence on methane oxidation at the lower temperatures between the moss- and

sedge-dominated wetland soils would give an insight for understanding or predicting methane dynamics in the arctic wetland under global warming. The vertical shift of the oxic-anoxic interface caused by the fluctuation of the water level may not affect the methane oxidation at the site as the methane oxidation potential is maintained over the  
5 depth. As microbial community in the arctic wetlands is geographically heterogeneous (Jansson et al., 2014), ecology of methane oxidizing bacteria actively involved in the methane cycle in the wetland of northeastern Siberia should be studied considering the vegetation types to better understand methane dynamics in this region.

10 *Author contributions.* JM and AS designed the experiments and JM carried them out. RS, TM, ST, and TCM helped with sampling, in situ data collection, and preparing resources for the fieldwork. JM prepared the paper with contributions from all co-authors.

*Competing interests.* The authors declare that they have no conflict of interest.

15

*Acknowledgements.* This research was partly supported by Grant-in-Aids, the Global COE Program “Establishment of Center for Integrated Field Environmental Science” (IFES-GCOE) from the Ministry of Education, Culture, Sports, Science and Technology-Japan (MEXT), the Green Network of Excellence (GRENE) Program funded by MEXT,  
20 and the COPERA (C budget of ecosystems and cities and villages on permafrost in eastern Russian Arctic) project funded by the Belmont Forum, and JST. This work was also supported by JSPS KAKENHI (Grants-in-Aid for Scientific Research) [16H05618] to J.M. The authors thank Y. Hoshino, A. Kononov, R. Petrov, E. Starostin, T. Stryukova, S. Ianygin for supporting our fieldwork.

## References

- 5 Basiliko, N., Knowles, R., and Moore, T. R.: Roles of moss species and habitat in methane consumption potential in a northern peatland, *Wetlands*, 24, 178-185, [https://doi.org/10.1672/0277-5212\(2004\)024\[0178:ROMSAH\]2.0.CO;2](https://doi.org/10.1672/0277-5212(2004)024[0178:ROMSAH]2.0.CO;2), 2004.
- Burns, R. G., DeForest, J. L., Marxsen, J., Sinsabaugh, R. L., Stromberger, M. E., Wallenstein, M. D., Weintraub, M. N., and Zoppini, A.: Soil enzymes in a changing  
10 environment: Current knowledge and future directions, *Soil Biol. Biochem.*, 58, 216-234, <https://doi.org/10.1016/j.soilbio.2012.11.009>, 2013.
- Cao, M. K., Gregson, K., and Marshall, S.: Global methane emission from wetlands and its sensitivity to climate change, *Atmos. Environ.*, 32, 3293-3299, [https://doi.org/10.1016/S1352-2310\(98\)00105-8](https://doi.org/10.1016/S1352-2310(98)00105-8), 1998.
- 15 Christiansen, J. R., Romero, A. J. B., Jorgensen, N. O. G., Glaring, M. A., Jorgensen, C. J., Berg, L. K., and Elberling, B.: Methane fluxes and the functional groups of methanotrophs and methanogens in a young Arctic landscape on Disko Island, West Greenland, *Biogeochemistry*, 122, 15-33, <https://doi.org/10.1007/s10533-014-0026-7>, 2015.
- 20 de Caritat, P., Hall, G., Gislason, S., Belsey, W., Braun, M., Goloubeva, N. I., Olsen, H. K., Scheie, J. O., and Vaive, J. E.: Chemical composition of arctic snow: concentration levels and regional distribution of major elements, *Sci. Total Environ.*, 336, 183-199, <https://doi.org/10.1016/j.scitotenv.2004.05.031>, 2005.
- Frenzel, P., and Bosse, U.: Methyl fluoride, an inhibitor of methane oxidation and



methane production, *FEMS Microbiol. Ecol.*, 21, 25-36, 1996.

Frenzel, P., and Rudolph, J.: Methane emission from a wetland plant: the role of CH<sub>4</sub> oxidation in *Eriophorum*, *Plant Soil*, 202, 27-32, <https://doi.org/10.1023/a:1004348929219>, 1998.

5 Frenzel, P.: Plant-associated methane oxidation in rice fields and wetlands, in: *Advances in Microbial Ecology*, edited by: Schink, B., Springer, Boston, 85-114, 2000.

Hugelius, G., Strauss, J., Zubrzycki, S., Harden, J. W., Schuur, E., Ping, C.-L., Schirmer, L., Grosse, G., Michaelson, G. J., and Koven, C. D.: Estimated stocks of circumpolar permafrost carbon with quantified uncertainty ranges and identified  
10 data gaps, *Biogeosciences*, 11, 6573-6593, <https://doi.org/10.5194/bg-11-6573-2014>, 2014.

Intergovernmental Panel on Climate Change: *Climate Change 2013: The Physical Science Basis: Working Group I Contribution to the Fifth Assessment Report of the Intergovernmental Panel on Climate Change*, Cambridge University Press, 2014.

15 Iwahana, G., Takano, S., Petrov, R. E., Tei, S., Shingubara, R., Maximov, T. C., Fedorov, A. N., Desyatkin, A. R., Nikolaev, A. N., Desyatkin, R. V., and Sugimoto, A.: Geocryological characteristics of the upper permafrost in a tundra-forest transition of the Indigirka River Valley, Russia, *Polar Science*, 8, 96-113, <https://doi.org/10.1016/j.polar.2014.01.005>, 2014.

20 Jansson JK, Tas N.: The microbial ecology of permafrost, *Nat. Rev. Micro.*, 12, 414-425, <https://doi.org/10.1038/nrmicro3262>, 2014.

King, G. M.: Physiological limitations of methanotrophic activity in situ, in: *Microbiology of atmospheric trace gases: sources, sinks and global change processes*, edited by: Murrell, J. C., and Kelly, D. P., I 39, Springer, Berlin, 17-32, 1996.

- Kip, N., van Winden, J. F., Pan, Y., Bodrossy, L., Reichart, G. J., Smolders, A. J. P., Jetten, M. S. M., Damste, J. S. S., and Op den Camp, H. J. M.: Global prevalence of methane oxidation by symbiotic bacteria in peat-moss ecosystems, *Nat Geosci*, 3, 617-621, <https://doi.org/10.1038/Ngeo939>, 2010.
- 5 Kip, N., Ouyang, W., van Winden, J., Raghoebarsing, A., van Niftrik, L., Pol, A., Pan, Y., Bodrossy, L., van Donselaar, E. G., Reichart, G.-J., Jetten, M. S. M., Sinninghe Damsté, J. S., and Op den Camp, H. J. M.: Detection, isolation, and characterization of acidophilic methanotrophs from *Sphagnum* mosses, *Appl. Environ. Microbiol.*, 77, 5643-5654, <https://doi.org/10.1128/aem.05017-11>, 2011.
- 10 Kirschke, S., Bousquet, P., Ciais, P., Saunois, M., Canadell, J. G., Dlugokencky, E. J., Bergamaschi, P., Bergmann, D., Blake, D. R., and Bruhwiler, L.: Three decades of global methane sources and sinks, *Nat Geosci*, 6, 813, <https://doi.org/10.1038/Ngeo1955>, 2013.
- 15 Knoblauch, C., Zimmermann, U., Blumenberg, M., Michaelis, W., and Pfeiffer, E. M.: Methane turnover and temperature response of methane-oxidizing bacteria in permafrost-affected soils of northeast Siberia, *Soil Biol. Biochem.*, 40, 3004-3013, <https://doi.org/10.1016/j.soilbio.2008.08.020>, 2008.
- 20 Kruger, M., Frenzel, P., and Conrad, R.: Microbial processes influencing methane emission from rice fields, *Glob. Chang. Biol.*, 7, 49-63, <https://doi.org/10.1046/j.1365-2486.2001.00395.x>, 2001.
- Kutzbach, L., Wagner, D., and Pfeiffer, E. M.: Effect of microrelief and vegetation on methane emission from wet polygonal tundra, Lena Delta, Northern Siberia, *Biogeochemistry*, 69, 341-362, <https://doi.org/10.1023/B:BIOG.0000031053.81520.db>, 2004.

- Larmola, T., Tuittila, E. S., Tirola, M., Nykanen, H., Martikainen, P. J., Yrjala, K., Tuomivirta, T., and Fritze, H.: The role of Sphagnum mosses in the methane cycling of a boreal mire, *Ecology*, 91, 2356-2365, <https://doi.org/10.1890/09-1343.1>, 2010.
- Liang, M., Sugimoto, A., Tei, S., Bragin, I. V., Takano, S., Morozumi, T., Shingubara, R., Maximov, T. C., Kiyashko, S. I., Velivetskaya, T. A., and Ignatiev, A. V.: Importance of soil moisture and N availability to larch growth and distribution in the Arctic taiga-tundra boundary ecosystem, northeastern Siberia, *Polar Science*, 8, 327-341, <http://dx.doi.org/10.1016/j.polar.2014.07.008>, 2014.
- Liebner, S., and Wagner, D.: Abundance, distribution and potential activity of methane oxidizing bacteria in permafrost soils from the Lena Delta, Siberia, *Environ. Microbiol.*, 9, 107-117, <https://doi.org/10.1111/j.1462-2920.2006.01120.x>, 2007.
- Liebner, S., Zeyer, J., Wagner, D., Schubert, C., Pfeiffer, E. M., and Knoblauch, C.: Methane oxidation associated with submerged brown mosses reduces methane emissions from Siberian polygonal tundra, *J. Ecol.*, 99, 914-922, <https://doi.org/10.1111/j.1365-2745.2011.01823.x>, 2011.
- Mackelprang, R., Waldrop, M. P., DeAngelis, K. M., David, M. M., Chavarria, K. L., Blazewicz, S. J., Rubin, E. M., and Jansson, J. K.: Metagenomic analysis of a permafrost microbial community reveals a rapid response to thaw, *Nature*, 480, 368-371, <https://doi.org/10.1038/nature10576>, 2011.
- Morozumi, T., Shingubara, R., Suzuki, R., Kobayashi, H., Tei, S., Takano, S., fan, R., Liang, M., Maximov, T. C., and Sugimoto, A.: Estimating methane emissions using vegetation mapping in the taiga-tundra boundary of a north-eastern Siberian lowland, *Tellus B: Chemical and Physical Meteorology*, <https://doi.org/10.1080/16000889.2019.1581004>, 2019 (in press).

- Nielsen, C. S., Michelsen, A., Ambus, P., Deepagoda, T. K. K. C., and Elberling, B.: Linking rhizospheric CH<sub>4</sub> oxidation and net CH<sub>4</sub> emissions in an arctic wetland based on <sup>13</sup>CH<sub>4</sub> labeling of mesocosms, *Plant Soil*, 412, 201-213, <https://doi.org/10.1007/s11104-016-3061-4>, 2017.
- 5 Olefeldt, D., Turetsky, M. R., Crill, P. M., and McGuire, A. D.: Environmental and physical controls on northern terrestrial methane emissions across permafrost zones, *Glob. Chang. Biol.*, 19, 589-603, <https://doi.org/10.1111/gcb.12071>, 2013.
- Parmentier, F. J. W., van Huissteden, J., van der Molen, M. K., Schaepman-Strub, G., Karsanaev, S. A., Maximov, T. C., and Dolman, A. J.: Spatial and temporal dynamics  
10 in eddy covariance observations of methane fluxes at a tundra site in northeastern Siberia, *Journal of Geophysical Research-Biogeosciences*, 116, <https://doi.org/10.1029/2010jg001637>, 2011.
- Petrescu, A. M. R., van Huissteden, J., Jackowicz-Korczynski, M., Yurova, A., Christensen, T. R., Crill, P. M., Backstrand, K., and Maximov, T. C.: Modelling CH<sub>4</sub>  
15 emissions from arctic wetlands: effects of hydrological parameterization, *Biogeosciences*, 5, 111-121, <https://doi.org/10.5194/bg-5-111-2008>, 2008.
- Preuss, I., Knoblauch, C., Gebert, J., and Pfeiffer, E. M.: Improved quantification of microbial CH<sub>4</sub> oxidation efficiency in arctic wetland soils using carbon isotope fractionation, *Biogeosciences*, 10, 2539-2552, [https://doi.org/10.5194/bg-10-2539-](https://doi.org/10.5194/bg-10-2539-2013)  
20 2013, 2013.
- Raghoebarsing, A. A., Smolders, A. J. P., Schmid, M. C., Rijpstra, W. I. C., Wolters-Arts, M., Derksen, J., Jetten, M. S. M., Schouten, S., Damste, J. S. S., Lamers, L. P. M., Roelofs, J. G. M., den Camp, H. J. M. O., and Strous, M.: Methanotrophic symbionts provide carbon for photosynthesis in peat bogs, *Nature*, 436, 1153-1156,

- <https://doi.org/10.1038/nature03802>, 2005.
- Reeburgh WS.: Oceanic methane biogeochemistry, *Chem. Rev.*, 107, 486-513, <http://pubs.acs.org/doi/full/10.1021/cr050362v>, 2007.
- Roslev, P., and King, G. M.: Regulation of methane oxidation in a freshwater wetland by  
5 water table changes and anoxia, *FEMS Microbiol. Ecol.*, 19, 105-115, [https://doi.org/10.1016/0168-6496\(95\)00084-4](https://doi.org/10.1016/0168-6496(95)00084-4), 1996.
- Saarnio, S., Alm, J., Silvola, J., Lohila, A., Nykanen, H., and Martikainen, P. J.: Seasonal  
variation in CH<sub>4</sub> emissions and production and oxidation potentials at microsites on an  
oligotrophic pine fen, *Oecologia*, 110, 414-422,  
10 <https://doi.org/10.1007/s004420050176>, 1997.
- Schuur, E. A. G., McGuire, A. D., Schadel, C., Grosse, G., Harden, J. W., Hayes, D. J.,  
Hugelius, G., Koven, C. D., Kuhry, P., Lawrence, D. M., Natali, S. M., Olefeldt, D.,  
Romanovsky, V. E., Schaefer, K., Turetsky, M. R., Treat, C. C., and Vonk, J. E.: Climate  
change and the permafrost carbon feedback, *Nature*, 520, 171-179,  
15 <https://doi.org/10.1038/nature14338>, 2015.
- Shingubara, R., Sugimoto, A., Murase, J., Iwahana, G., Tei, S., Liang, M., Takano, S.,  
Morozumi, T., and Maximov, T. C.: Multi-year effect of wetting on CH<sub>4</sub> flux at taiga–  
tundra boundary in northeastern Siberia deduced from stable isotope ratios of CH<sub>4</sub>,  
*Biogeosciences*, 16, 755-768, <https://doi.org/10.5194/bg-16-755-2019>, 2019.
- 20 Sistla SA, Asao S, Schimel JP. 2012. Detecting microbial N-limitation in tussock tundra  
soil: Implications for Arctic soil organic carbon cycling. *Soil Biol. Biochem.*, 55, 78-  
84, <https://doi.org/10.1016/j.soilbio.2012.06.010>.
- Steven, B., Niederberger, T. D., Bottos, E. M., Dyen, M. R., and Whyte, L. G.:  
Development of a sensitive radiorespiration method for detecting microbial activity at

subzero temperatures, *J. Microbiol. Methods*, 71, 275-280,  
<https://doi.org/10.1016/j.mimet.2007.09.009>, 2007.

Sundh, I., Mikkela, C., Nilsson, M., and Svensson, B. H.: Potential aerobic methane oxidation in a Sphagnum-dominated peatland - controlling factors and relation to methane emission, *Soil Biol. Biochem.*, 27, 829-837, [https://doi.org/10.1016/0038-0717\(94\)00222-M](https://doi.org/10.1016/0038-0717(94)00222-M), 1995.

Tarnocai, C., Canadell, J. G., Schuur, E. A. G., Kuhry, P., Mazhitova, G., and Zimov, S.: Soil organic carbon pools in the northern circumpolar permafrost region, *Global Biogeochem. Cy.*, 23, GB2023, <https://doi.org/10.1029/2008GB003327>, 2009.

10 Throckmorton, H. M., Heikoop, J. M., Newman, B. D., Altmann, G. L., Conrad, M. S., Muss, J. D., Perkins, G. B., Smith, L. J., Torn, M. S., Wullschlegel, S. D., and Wilson, C. J.: Pathways and transformations of dissolved methane and dissolved inorganic carbon in Arctic tundra watersheds: Evidence from analysis of stable isotopes, *Global Biogeochem. Cy.*, 29, 1893-1910, <https://doi.org/10.1002/2014gb005044>, 2015.

15 Treat, C. C., Natali, S. M., Ernakovich, J., Iversen, C. M., Lupascu, M., McGuire, A. D., Norby, R. J., Roy Chowdhury, T., Richter, A., Šantrůčková, H., Schädel, C., Schuur, E. A. G., Sloan, V. L., Turetsky, M. R., and Waldrop, M. P.: A pan-Arctic synthesis of CH<sub>4</sub> and CO<sub>2</sub> production from anoxic soil incubations, *Glob. Chang. Biol.*, 21, 2787-2803, <https://doi.org/10.1111/gcb.12875>, 2015.

20 Vecherskaya, M. S., Galchenko, V. F., Sokolova, E. N., and Samarkin, V. A.: Activity and species composition of aerobic methanotrophic communities in tundra soils, *Curr. Microbiol.*, 27, 181-184, <https://doi.org/10.1007/bf01576018>, 1993.

Wagner, D., Kobabe, S., Pfeiffer, E. M., and Hubberten, H. W.: Microbial controls on methane fluxes from a polygonal tundra of the Lena Delta, Siberia, *Permafrost and*

Periglacial Processes, 14, 173-185, <https://doi.org/10.1002/ppp.443>, 2003.

Wagner, D., Lipski, A., Embacher, A., and Gattinger, A.: Methane fluxes in permafrost habitats of the Lena Delta: effects of microbial community structure and organic matter quality, *Environ. Microbiol.*, 7, 1582-1592, <https://doi.org/10.1111/j.1462-2920.2005.00849.x>, 2005.

5

Whalen, S. C., and Reeburgh, W. S.: Methane oxidation, production, and emission at contrasting sites in a boreal bog, *Geomicrobiol. J.*, 17, 237-251, 2000.

Zhuang, Q., Melillo, J. M., Kicklighter, D. W., Prinn, R. G., McGuire, A. D., Steudler, P. A., Felzer, B. S., and Hu, S.: Methane fluxes between terrestrial ecosystems and the atmosphere at northern high latitudes during the past century: A retrospective analysis with a process-based biogeochemistry model, *Global Biogeochem. Cy.*, 18, <https://doi.org/10.1029/2004gb002239>, 2004.

10

## Figure legends

**Figure 1.** Distant (A) and close-range (B-E) views of the study sites. Soil samples were collected from the wetlands dominated by (C) moss and (D) sedge and from (E) moss-  
5 dominated mound.

**Figure 2.** Temporal change of methane concentration in the headspace of the microcosms with soil samples collected from the different vegetation types in 2012 (A, moss; B; sedge; C, moss in the mound) treated with inorganic nutrient and black carbon. Bars  
10 indicate the standard error (n=3).

**Figure 3.** Methane oxidation by the different depth layers of moss- and sedge- dominated soils in 2013 (A and B) and 2015 (C). Bars indicate the standard error (n=3).

15 **Figure 4.** Vertical profile of dissolved oxygen in pore water of the wetland soils. Three independent measurements for sedge and moss dominated wetlands were done at the study site in 2014.

**Figure 5.** Effect of incubation temperature on methane oxidation by (A) moss and (B)  
20 sedge dominated peat samples and (C) the temperature dependence of the methane oxidation rate (0-10 cm) (2014). Bars indicate the standard error (n=3). Data marked with different letters are significantly different ( $P < 0.05$ , as determined by Tukey's honestly significant difference test).



**Figure 6.** Temperature coefficient ( $Q_{10}$ ) of methane oxidation estimated between different temperature ranges.

**Figure 7.** Effect of  $\text{CH}_2\text{F}_2$  on methane flux from wetland estimated by the closed chamber method. Methane flux 1, 1st measurement without  $\text{CH}_2\text{F}_2$ ; Methane flux 2, 2nd measurement after injection with or without  $\text{CH}_2\text{F}_2$ .
